# Supplementary material for: Plant Alkaloid Tetrandrine Is a Nuclear Receptor 4A1 Antagonist and Inhibits Panc-1 Cell Growth In Vitro and In Vivo
Source: Int J Mol Sci. 2022 May 9;23(9):5280. doi: 10.3390/ijms23095280 (PMC9104798; doi:10.3390/ijms23095280)
Supplement: Supplementary file 1 [file ijms-23-05280-s001.zip › ijms-1712932-supplementary.pdf]

## **SUPPLEMENTAL METATERIALS**

**2 Tables**

**6 Figures**

**Supplemental Table S1. Effects of TTD on body weight and food intake in a mouse xenograft model of human pancreatic cancer**

|                    | Body weight gain<br>(g/4 weeks) | Food intake (g/week/mouse) |
|--------------------|---------------------------------|----------------------------|
| Control            | 2.50±0.00                       | 21.25±5.71                 |
| TTD (25 mg/kg/day) | 2.08±1.46                       | 20.45±4.68                 |

All results are presented as means ± SD (n=5 or 6).

**Supplemental Table S2. Effects of TTD on organ weights in a mouse xenograft model of human pancreatic cancer**

|                       | Organ weight (mg/g body weight) |           |            |           |           |
|-----------------------|---------------------------------|-----------|------------|-----------|-----------|
|                       | Liver                           | Spleen    | Kidney     | Heart     | Lung      |
| Control               | 47.51±1.93                      | 5.01±0.47 | 13.33±0.80 | 4.75±0.52 | 5.25±0.41 |
| TTD<br>(25 mg/kg/day) | 41.77±3.50                      | 4.95±0.61 | 14.16±1.00 | 4.88±0.24 | 5.21±0.29 |

All results are presented as means ± SD (n=5 or 6).

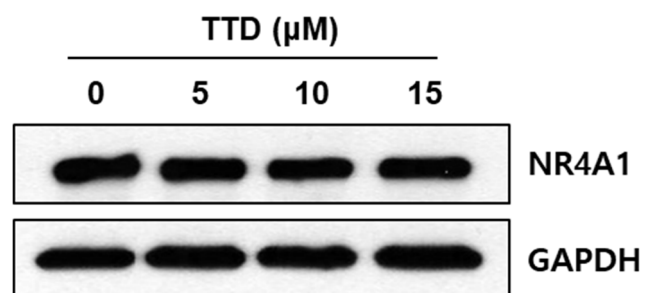

**Supplemental Figure S1. Effects of TTD on protein expression of NR4A1 in Panc-1 cells.** Cells were treated with TTD for 24 h, and whole cell lysates were analyzed by western blot analysis. GAPDH was used as a loading control.

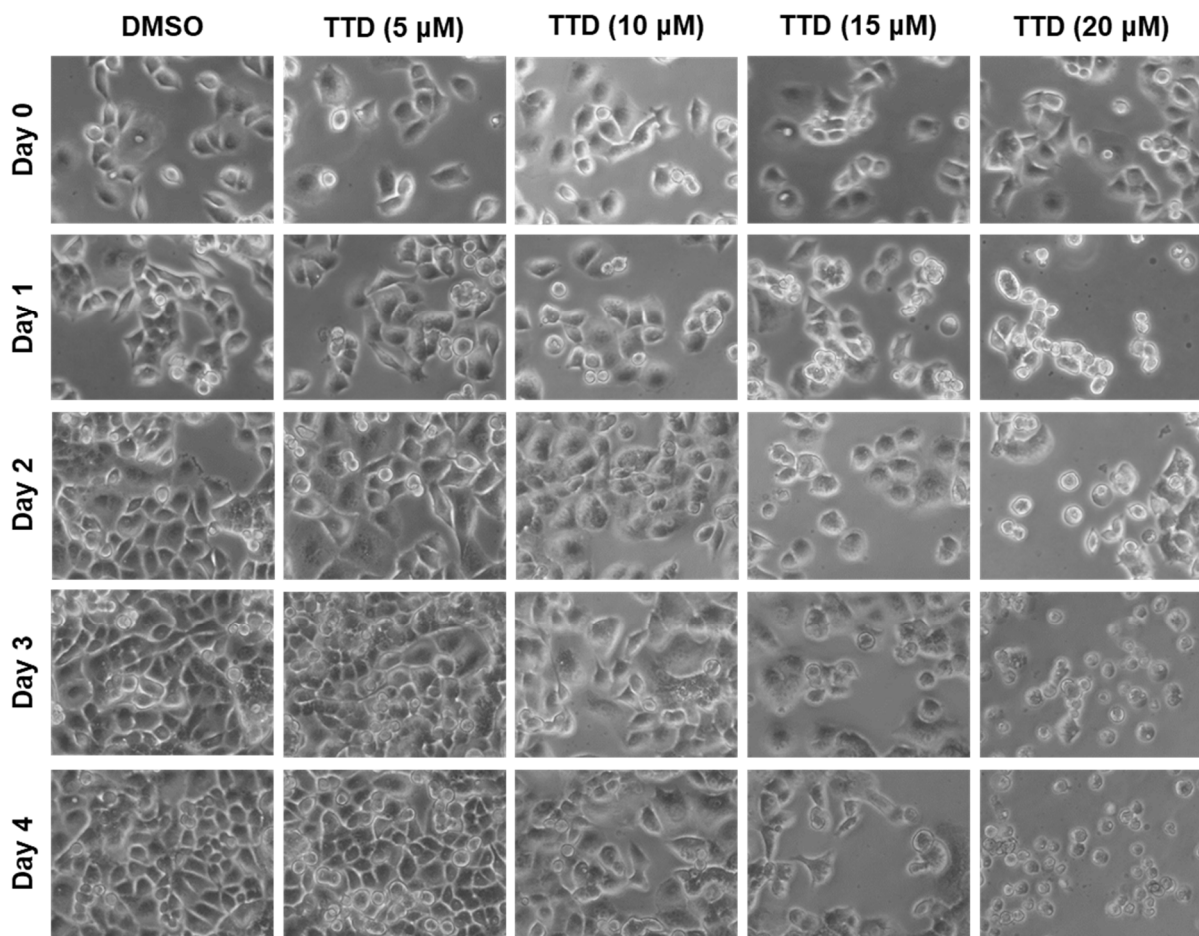

**Supplemental Figure S2. Effect of TTD on the morphology of Panc-1 cells.** Cells were treated with TTD for 1, 2, 3, or 4 days, and cells in each well were photographed using a phase-contrast microscope at x100 magnification. Representative images are shown.

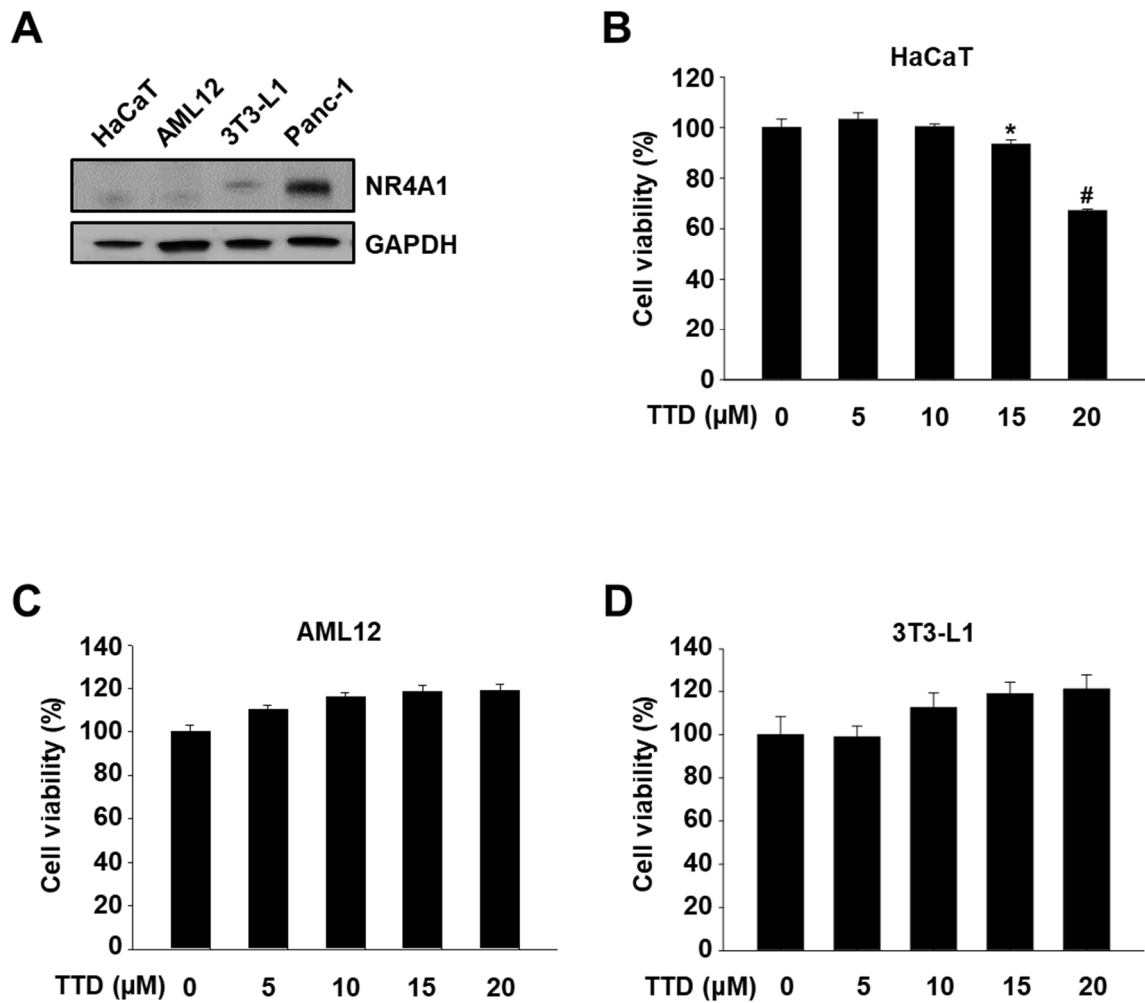

**Supplemental Figure S3. Effects of TTD on viability of normal cell lines.** (A) Whole-cell lysates from each cell lines were analyzed by western blot analysis, and GAPDH was used as a loading control. (B-D) Cells ( $3 \times 10^4$  cells/well) were plated in 48-well plate and grown overnight. Cells were then treated with various concentrations of TTD for 24 h, and cell viability was determined.

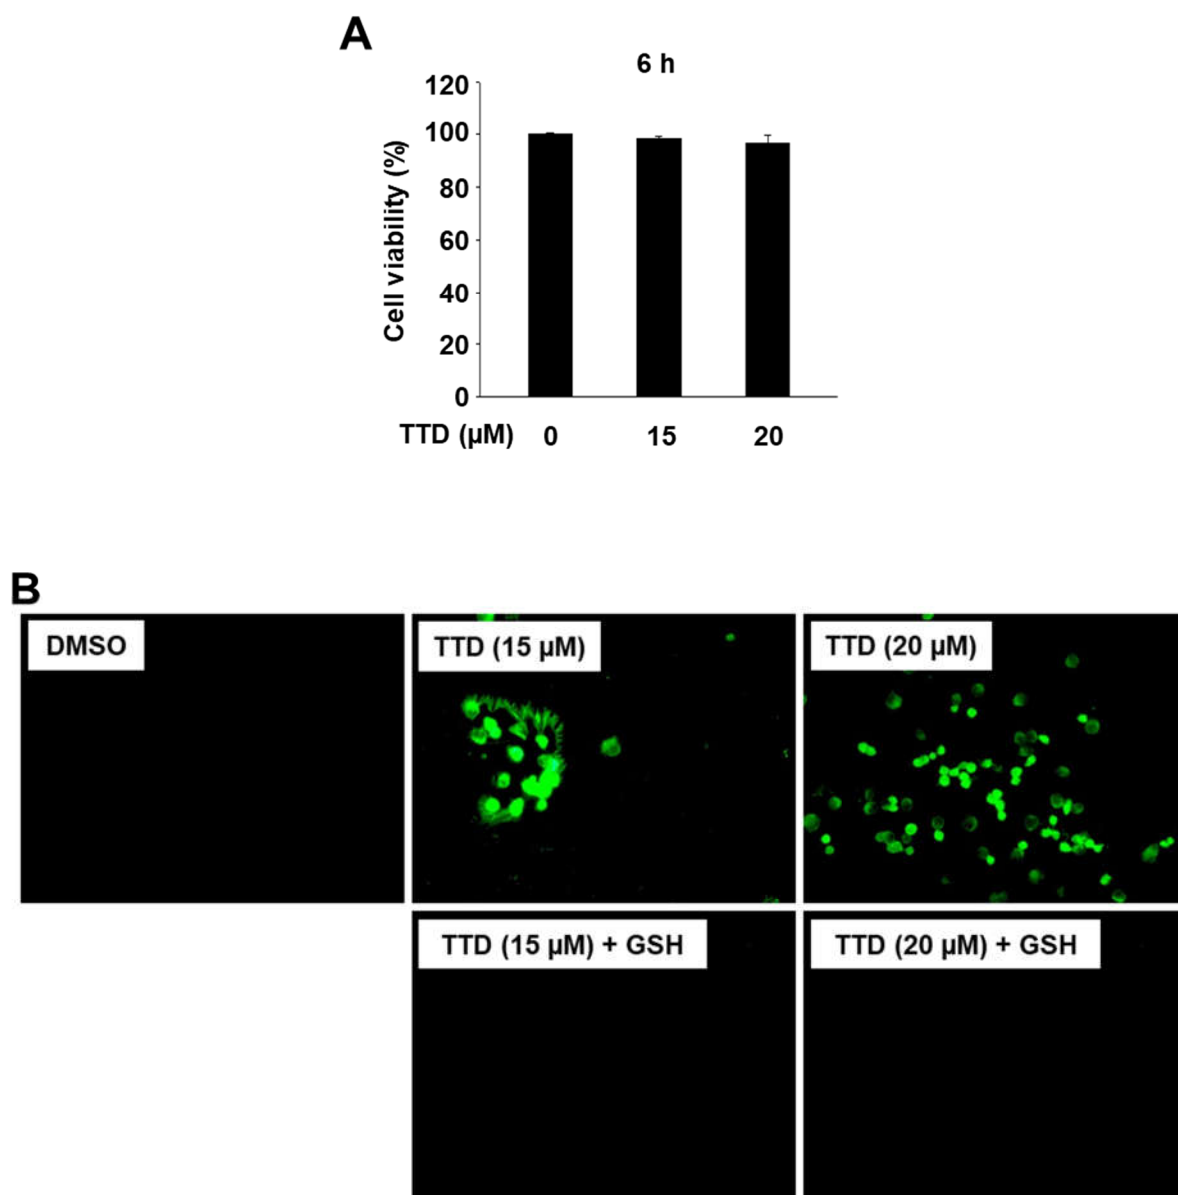

**Supplemental Figure S4. TTD increases ROS production in Panc-1 cells.** Cells were treated with TTD in the presence or absence of GSH (10 mM) for 6 h, and intracellular ROS level was measured by fluorescence microscopy (x200) as described in the Materials and methods.

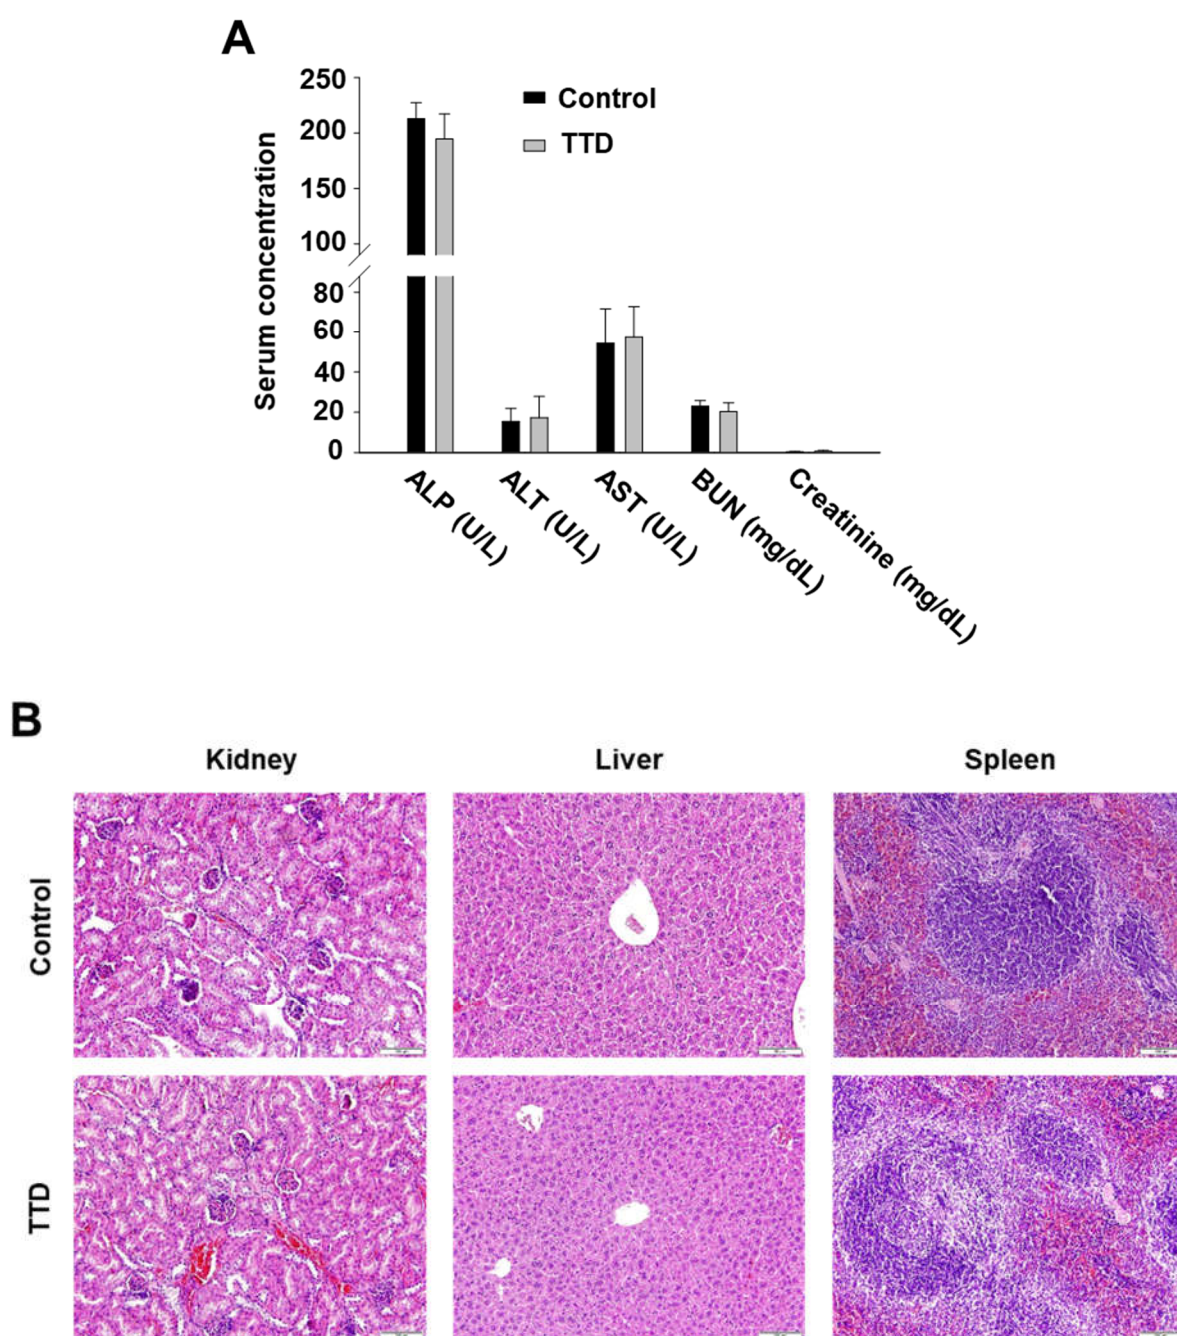

**Supplemental Figure S5. Effects of TTD on serum levels of liver and kidney biomarkers and histology of three major organs in a mouse xenograft model of human pancreatic cancer.** Serum samples (A) and tissue sections (B) were prepared and analyzed as described in the Materials and Methods. The results are presented as means  $\pm$  SD, and images were collected at high (x 200) magnification.

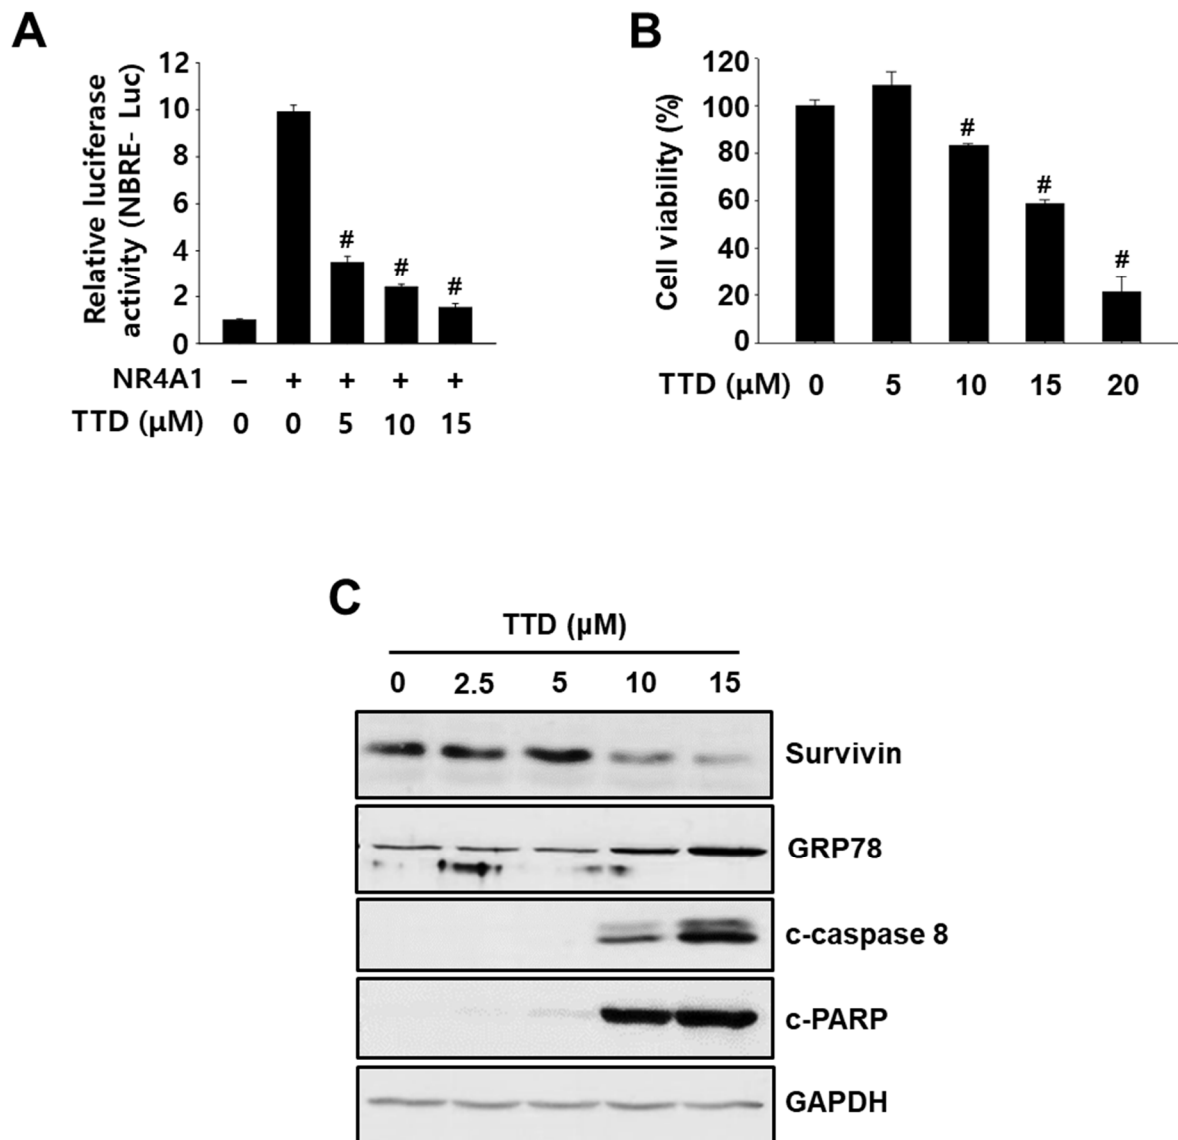

**Supplemental Figure S6. TTD inhibits NR4A1-dependent transactivation and induces apoptosis in MiaPaCa-2 cells.** (A) Cells were cotransfected with NBRE-Luc (25 ng) and Flag-NR4A1 (12.5 ng) for 5 h, and then treated with TTD for 18 h. Luciferase activity (relative to  $\beta$ -galactosidase) was determined, and the corresponding empty vector was used as a control. (B) Cells were treated with TTD for 24 h, and cell viability was determined. (C) Cells were treated with TTD for 24 h, and whole-cell lysates were analyzed by western blot analysis.

GAPDH was used as a loading control. The results are presented as means  $\pm$  SEM ( $n \geq 3$ ).

<sup>#</sup> $P < 0.001$  vs. DMSO + NBRE-Luc or DMSO.
